# Supplementary material
Source: PubMed Central journal article supplement (PMC3109531)
Supplement: supp_blood-2010-11-319186_TableS1.pdf [file supp_blood-2010-11-319186_TableS1.pdf]

| <b>Clinical symptoms at presentation</b>    | <b>No. of pts (%)</b> |
|---------------------------------------------|-----------------------|
| Cough                                       | 17 (89.5)             |
| Fever                                       | 11 (57.9)             |
| Fatigue/weakness                            | 8 (42.1)              |
| Shortness of breath                         | 7 (36.8)              |
| Rhinorrhea                                  | 5 (26.3)              |
| Myalgia                                     | 4 (21.1)              |
| Chills                                      | 3 (15.8)              |
| Headache                                    | 3 (15.8)              |
| Sore throat                                 | 2 (10.5)              |
| Wheezing                                    | 2 (10.5)              |
| Vomiting                                    | 2 (10.5)              |
| Diarrhea                                    | 1 (5.3)               |
| <b>Comorbidity</b>                          |                       |
| Chronic cardiovascular disease (except HBP) | 2 (10.5)              |
| Chronic lung disease                        | 3 (15.8)              |
| Neurocognitive & neuromuscular disease      | 2 (10.5)              |
| Chronic renal disease                       | 2 (10.5)              |
| Diabetes                                    | 4 (21.1)              |
| Obesity <sup>a</sup>                        | 6 (31.6)              |
| Co-infection                                | 8 (42.1)              |
| Hospitalization                             | 10 (52.6)             |
| Admission to ICU                            | 5 (26.3)              |

| <b>Laboratory test</b>                   | <b>Median (range)</b>     |
|------------------------------------------|---------------------------|
| White cell count, per mL                 | 3,900 (110–11,320)        |
| Absolute lymphocyte count, per mL        | 329.5 (0–2,749)           |
| Platelet count                           | 92,000<br>(6,000–300,000) |
| Creatinine, mg/dl                        | 1.08 (0.4–3.8)            |
| Aspartate aminotransferase, IU/L         | 44 (14–133)               |
| Alanine aminotransferase, IU/L           | 51.5 (16–151)             |
| Total bilirubin, mg/dl                   | 0.7 (0.3–3.2)             |
| Albumin, g/dl                            | 3.3 (1.9–4.2)             |
| Duration of hospitalization, days        | 20 (2–47)                 |
| Duration of mechanical ventilation, days | 8 (3–19)                  |

<sup>a</sup> Obesity is defined as a body mass index (BMI) more or equal to 30 in adults 18 years of age or older or a BMI percentile of 95 to 100 in children between the ages of 2 and 18 years.
